# Supplementary material for: Functional Genomic Analysis of Variation on Beef Tenderness Induced by Acute Stress in Angus Cattle
Source: Hindawi journal article supplement (doi:10.1155/2012/756284), 2012-01-01
Supplement: f1 [file 756284.f1.pdf]

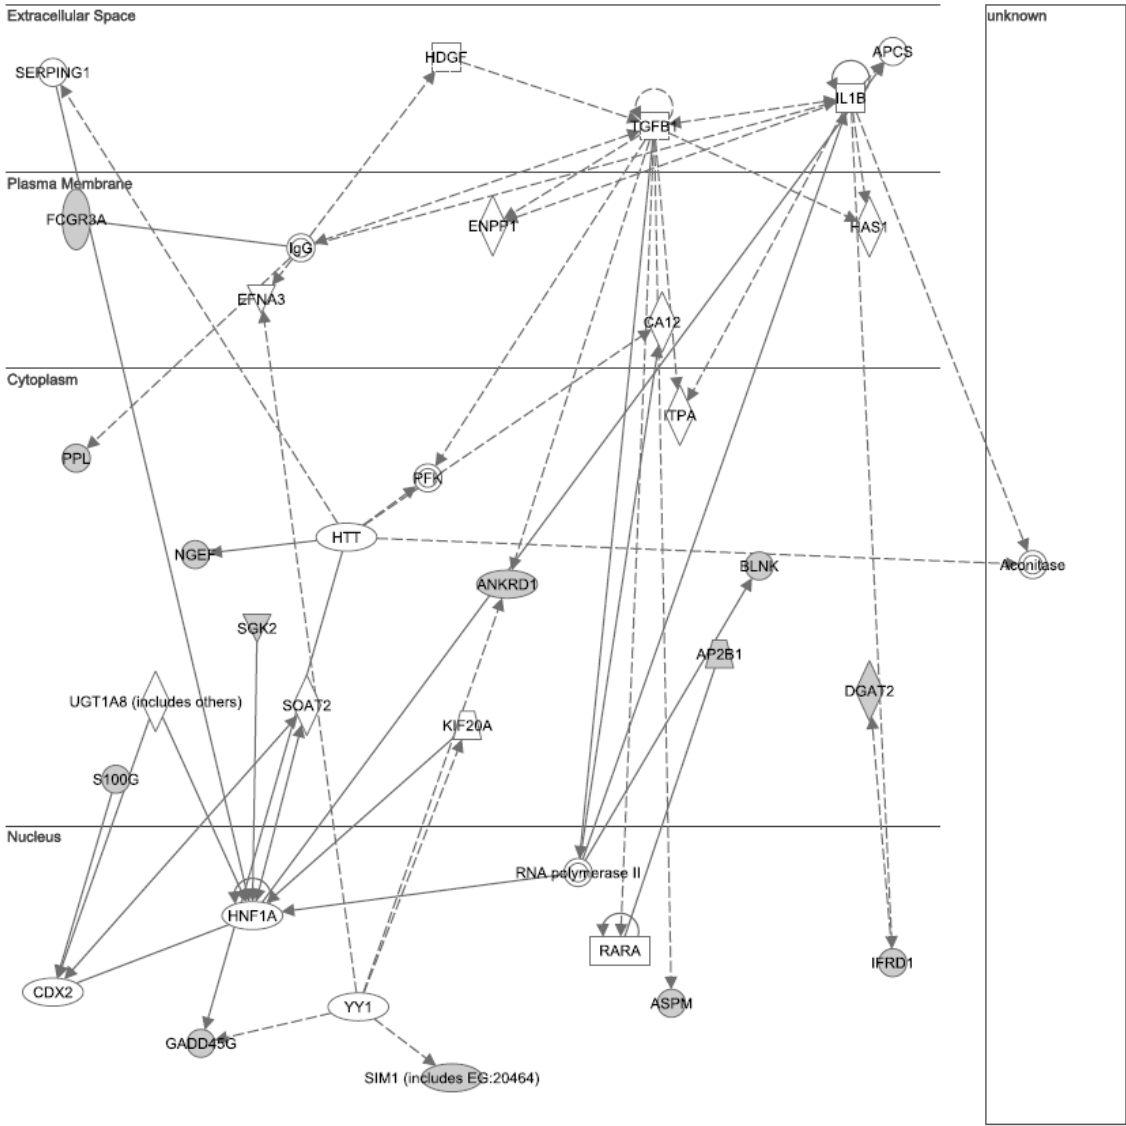

Supplementary Fig. 1 The top 2 # network significantly differentially expressed genes involved in. Solid line represents direct interaction and dash line represents indirect interaction.
