# Supplementary material for: Functional Genomic Analysis of Variation on Beef Tenderness Induced by Acute Stress in Angus Cattle
Source: Hindawi journal article supplement (doi:10.1155/2012/756284), 2012-01-01
Supplement: f3 [file 756284.f3.pdf]

Supplementary Table 1 Primers for RT-PCR

| Genes  | ProbeName   | Accession Number | Primers | Sequence (5' to 3')    | Size (bp) |
|--------|-------------|------------------|---------|------------------------|-----------|
| HSPA1A | A_73_115519 | NM_203322.2      | F       | TCAACATGAAGAGCGCCGTGGA | 114       |
|        |             |                  | R       | TGTTGGCGTCCAGCCAGGAAAT |           |
| CXCL1  | A_73_120022 | NM_175700.1      | F       | AGACTGGTCAGGAAGTGTGT   | 135       |
|        |             |                  | R       | CACTGAGGCTGCTGGAGTAT   |           |
| IL12A  | A_73_119429 | NM_174355.1      | F       | AGACCAGAACATGCTGGCAG   | 142       |
|        |             |                  | R       | GAAGGCGTGAAGAAGGATGC   |           |
| JOSD1  | A_73_120090 | NM_001014898.2   | F       | GCCTTCACCCGGGAAACGCT   | 182       |
|        |             |                  | R       | ATGGCGCCAACATCCCTGCG   |           |
| GAPDH  |             | NM_001034034.1   | F       | GATTGTCAGCAATGCCTCCT   | 94        |
|        |             |                  | R       | GGTCATAAGTCCCTCCACGA   |           |
