# Supplementary material for: Functional Genomic Analysis of Variation on Beef Tenderness Induced by Acute Stress in Angus Cattle
Source: Hindawi journal article supplement (doi:10.1155/2012/756284), 2012-01-01
Supplement: f4 [file 756284.f4.pdf]

Supplementary Table 2 Primers for bisulfited-PCR

| Gene name | ProbeName<br>Microarray | in | GeneBank<br>Accession Number | Primers | Sequence (5' to 3')      | Size<br>(bp) |
|-----------|-------------------------|----|------------------------------|---------|--------------------------|--------------|
| IL12A     | A_73_119429             |    | NM_174355. 1                 | F       | AGAGGATGTTTTATAGGGYGTAG  | 167          |
|           |                         |    |                              | R       | CRCTTCACAATAAAATAACCAACC |              |
|           |                         |    |                              | S       | ATAGGGYGTAGGATAAGT       |              |
| HSPA1A    | A_73_115519             |    | NM_203322. 2                 | F       | GGATATYGTTTGYGTAGTTTGGTT | 138          |
|           |                         |    |                              | R       | TATTACCAACCCATTCCAATCACA |              |
|           |                         |    |                              | S       | AGTTATAGGGGTTTTTTTATT    |              |
| AP2B1     | A_73_100724             |    | NM_001075125. 1              | F       | TGTTAGGGATAAAGATGGTGGAT  | 103          |
|           |                         |    |                              | R       | CAAAAAATAATCCCTCCTTTCT   |              |
|           |                         |    |                              | S       | AAAATAATCCCTCCTTTCT      |              |
| ASPM      | A_73_107807             |    | XM_614763. 5                 | F       | GGGGTTGTTTAGGATTAGGG     | 97           |
|           |                         |    |                              | R       | CCTATCCCTCAACCACTTCTACA  |              |
|           |                         |    |                              | S       | CCTCAACCACTTCTACAAAT     |              |
| DEPDC6    | A_73_107834             |    | XM_870049. 1                 | F       | GGTGATTGTGATGGGTTTAGTTAT | 143          |
|           |                         |    |                              | R       | CCAAAAAACAACCTCACCTCTA   |              |
|           |                         |    |                              | S       | CCCCCTACCCCATACT         |              |
| LOC614805 | A_73_117241             |    | XM_864993. 3                 | F       | GTGGGGAAAAAATTTAAGATATT  | 145          |
|           |                         |    |                              | R       | TAAATCCCCCAAATAAACCTCC   |              |
|           |                         |    |                              | S       | ATTAGGATTTAATTTGGTAG     |              |

F: forward primer. R: reverse primer. S: sequencing. Y and R stand for C/T and G/A, respectively.
